# Supplementary material for: Spectroscopic characterization and photochemistry of the vinylsulfinyl radical
Source: Royal Society of Chemistry journal article supplement (doi:10.1039/d1cp02584h), 2021-01-01
Supplement: d1cp02584h1.pdf [file d1cp02584h1.pdf]

## Electronic Supplementary Information

### Spectroscopic Characterization and Photochemistry of the Vinylsulfinyl Radical

Zhuang Wu,<sup>a</sup> Lina Wang,<sup>a</sup> Bo Lu,<sup>a</sup> André K. Eckhardt,<sup>b</sup> Peter R. Schreiner,<sup>\*b</sup> and Xiaoqing Zeng<sup>\*a</sup>

<sup>a</sup>Department of Chemistry, Shanghai Key Laboratory of Molecular Catalysts and Innovative Materials, Fudan University, Shanghai, 200433 (China)

<sup>b</sup>Institute of Organic Chemistry, Justus-Liebig University, Heinrich-Buff-Ring 17, 35392 Giessen (Germany)

Corresponding Author \*E-mail: xqzeng@fudan.edu.cn; prs@uni-giessen.de

#### Table of Contents

|                                                                                                                                                    |    |
|----------------------------------------------------------------------------------------------------------------------------------------------------|----|
| <sup>1</sup> H, <sup>19</sup> F, <sup>13</sup> C NMR spectra of CH <sub>2</sub> =C(H)S(O)CF <sub>3</sub> in CDCl <sub>3</sub> (Figures S1–S3)..... | S2 |
| IR spectrum of the HVFP products of CH <sub>2</sub> =C(H)S(O)CF <sub>3</sub> in solid Ne (Figure S4) .....                                         | S4 |
| IR spectrum of the HVFP products of CH <sub>2</sub> =C(H)S(O)CF <sub>3</sub> in solid Ar (Figure S5) .....                                         | S5 |
| Calculated anharmonic frequencies of CH <sub>2</sub> =C(H)SO• isomers (Table S1) .....                                                             | S6 |
| TD-DFT calculated vertical transitions of CH <sub>2</sub> =C(H)SO• isomers (Table S2).....                                                         | S7 |
| Energies and atomic coordinates for CH <sub>2</sub> =C(H)SO• isomers.....                                                                          | S8 |

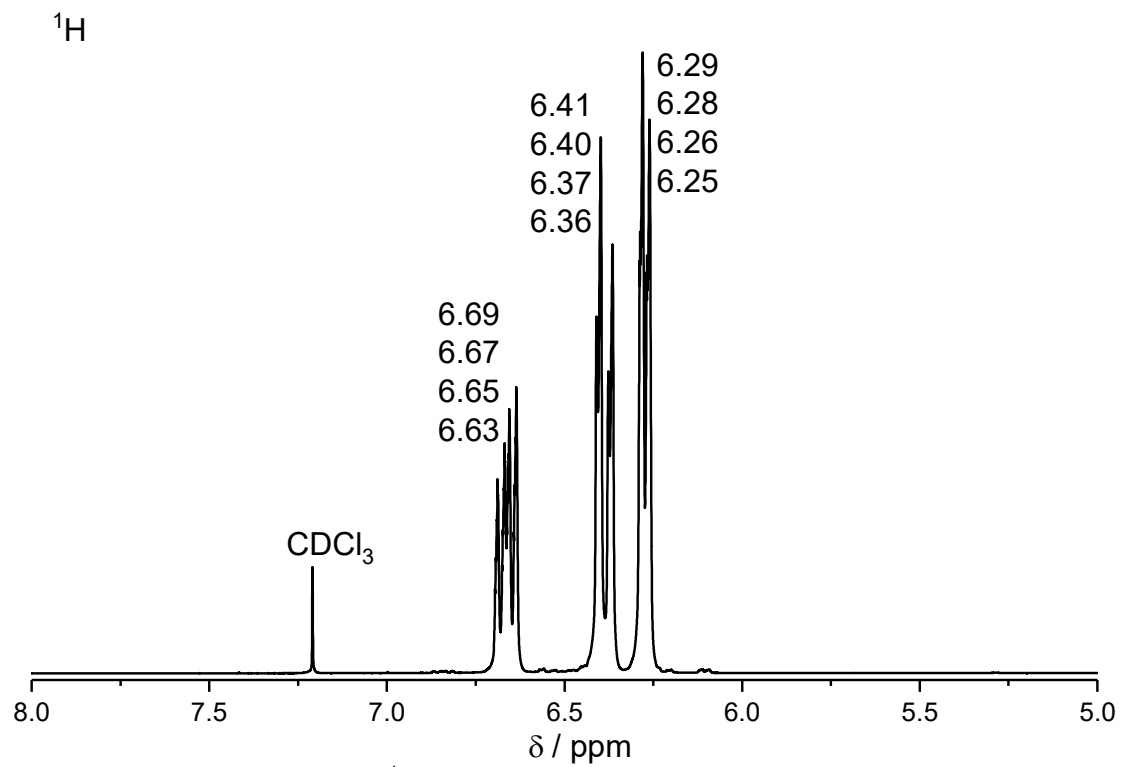

**Figure S1.**  $^1\text{H}$  NMR of  $\text{CH}_2=\text{C}(\text{H})\text{S}(\text{O})\text{CF}_3$  in  $\text{CDCl}_3$ .

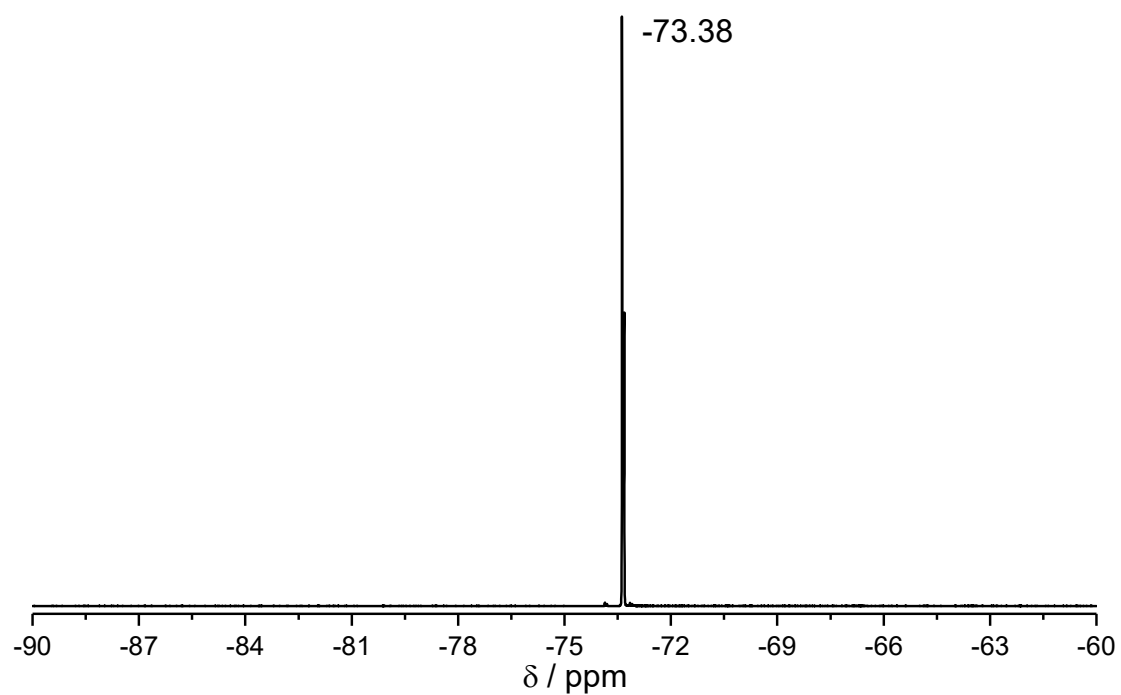

**Figure S2.**  $^{19}\text{F}$  NMR of  $\text{CH}_2=\text{C}(\text{H})\text{S}(\text{O})\text{CF}_3$  in  $\text{CDCl}_3$ .

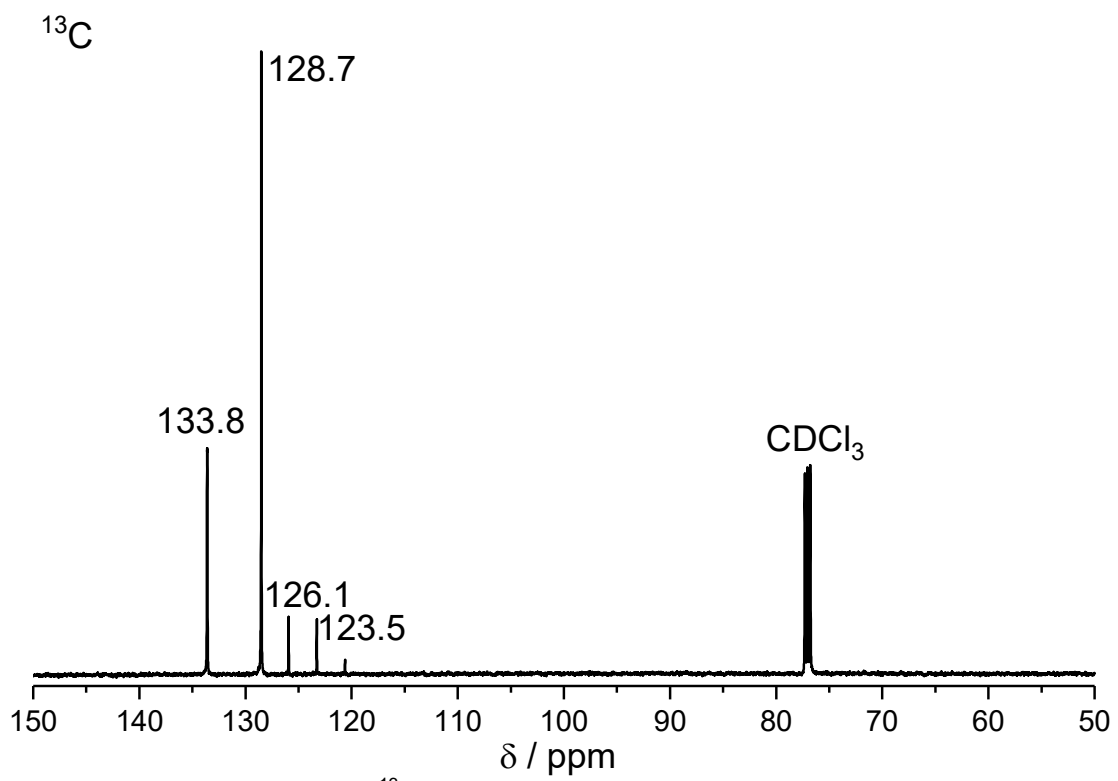

**Figure S3.** <sup>13</sup>C NMR of CH<sub>2</sub>=C(H)S(O)CF<sub>3</sub> in CDCl<sub>3</sub>.

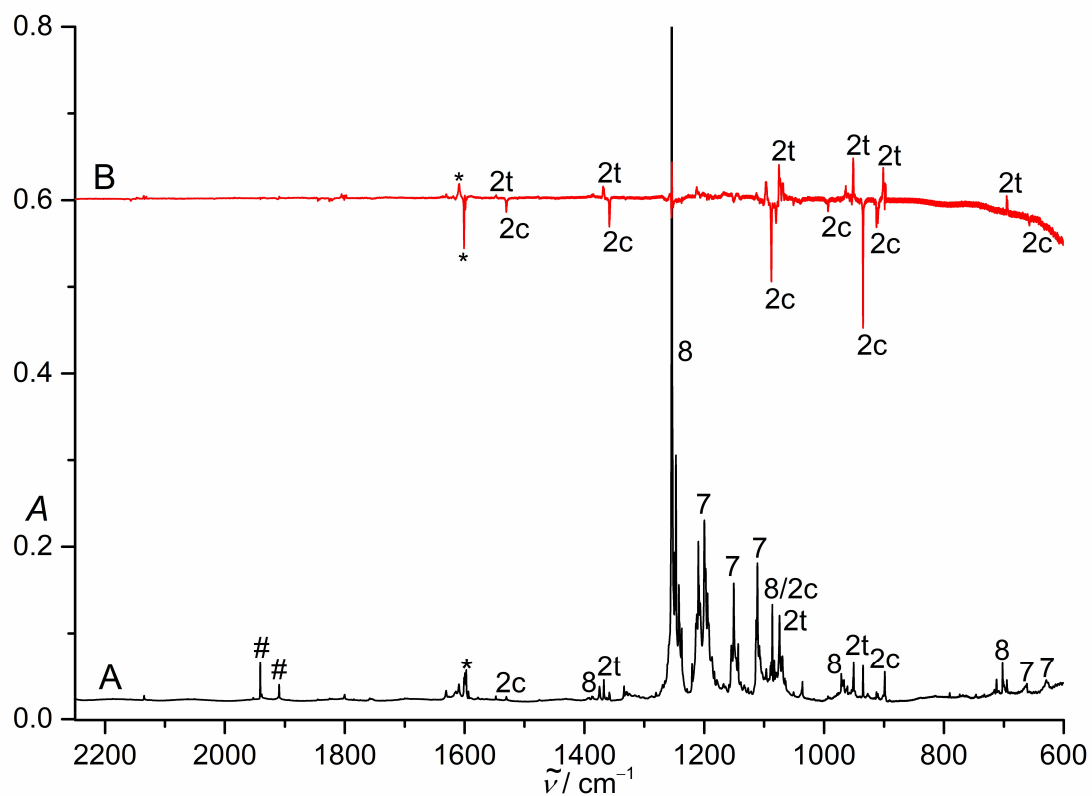

**Figure S4.** (A) IR spectrum of the high-vacuum flash pyrolysis (HVFP, 800 K) products of  $\text{CH}_2=\text{C}(\text{H})\text{S}(\text{O})\text{CF}_3$  (**7**) in solid Ne (**7** : Ne = 1:1000, 150 min deposition) at 2.8 K; (B) IR difference spectrum reflecting the conversion of *cis*- $\text{CH}_2=\text{C}(\text{H})\text{SO}\cdot$  (**2c**) to *trans*- $\text{CH}_2=\text{C}(\text{H})\text{SO}\cdot$  (**2t**) upon irradiation with an UV-light LED (365 nm, 10 min). The IR bands of  $\cdot\text{CF}_3$  (**8**),  $\text{CF}_2\text{O}$  (**#**), and  $\text{H}_2\text{O}$  (\*) are also labeled.

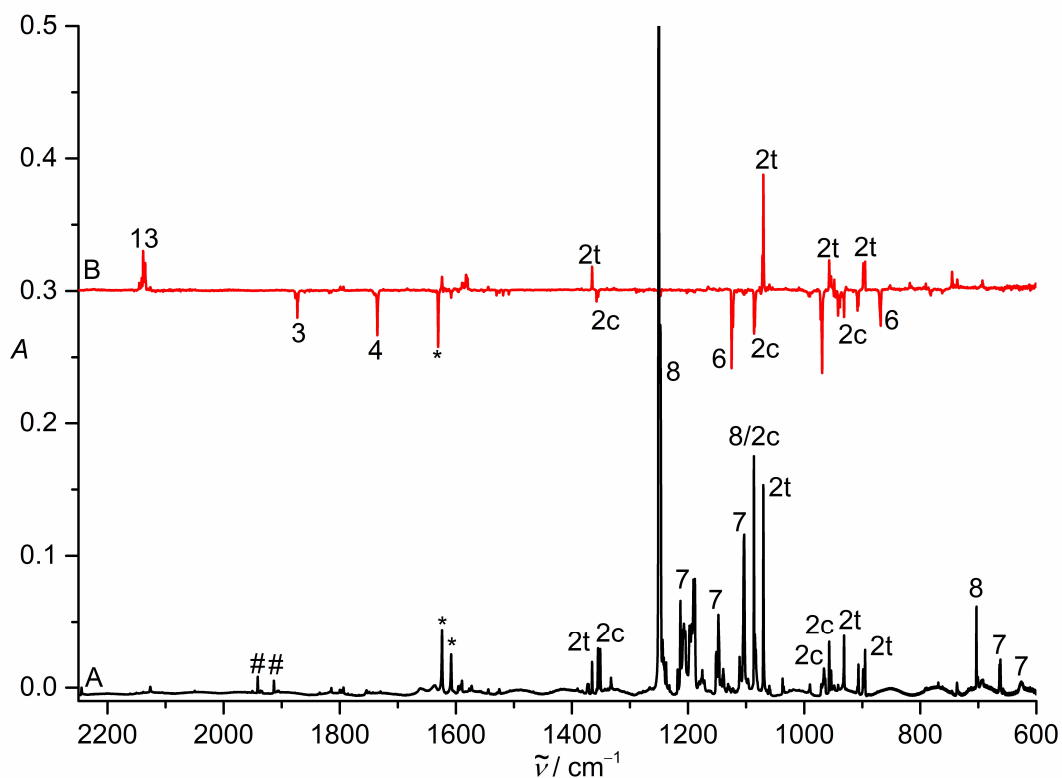

**Figure S5.** (A) IR spectrum of the high-vacuum flash pyrolysis (HVFP, 800 K) products of  $\text{CH}_2=\text{C}(\text{H})\text{S}(\text{O})\text{CF}_3$  (**7**) in solid Ar (**7** : Ar = 1:1000, 150 min deposition) at 10.0 K; (B) IR difference spectrum reflecting the conversion of *cis*- $\text{CH}_2=\text{C}(\text{H})\text{SO}\cdot$  (**2c**) to *trans*- $\text{CH}_2=\text{C}(\text{H})\text{SO}\cdot$  (**2t**) upon irradiation with a UV-light LED (365 nm, 10 min). The IR bands of  $\text{CH}_3\text{SCO}\cdot$  (**3**),  $\cdot\text{CH}_2\text{SC}(\text{O})\text{H}$  (**4**),  $\text{CH}_3\text{C}(\text{O})\text{S}\cdot$  (**6**),  $\text{CH}_2=\text{C}(\text{H})\text{S}(\text{O})\text{CF}_3$  (**7**),  $\cdot\text{CF}_3$  (**8**),  $\text{CH}_3\text{S}\cdot\cdots\text{CO}$  (**9**), CO (**13**),  $\text{CF}_2\text{O}$  (#), and  $\text{H}_2\text{O}$  (\*) are also labeled.

**Table S1.** Calculated anharmonic frequencies of CH<sub>2</sub>=C(H)SO• isomers at B3LYP/6 311++G(3df,3pd) level.

| <i>trans</i> -CH <sub>3</sub> SCO• | <i>cis</i> -CH <sub>3</sub> SCO• | <i>trans</i> -•CH <sub>2</sub> SC(O)H | <i>cis</i> -•CH <sub>2</sub> SC(O)H |
|------------------------------------|----------------------------------|---------------------------------------|-------------------------------------|
| 3016 (3)                           | 3008 (3)                         | 3136 (0.1)                            | 3138 (2)                            |
| 3006 (3)                           | 2995 (3)                         | 3026 (2)                              | 3026 (0.8)                          |
| 2956 (16)                          | 2941 (9)                         | 2775 (49)                             | 2812 (51)                           |
| 1844 (401)                         | 1822 (308)                       | 1744 (431)                            | 1717 (328)                          |
| 1438 (13)                          | 1437 (4)                         | 1378 (0.2)                            | 1356 (4)                            |
| 1433 (6)                           | 1414 (7)                         | 1319 (12)                             | 1327 (6)                            |
| 1328 (2)                           | 1308 (5)                         | 934 (15)                              | 931 (7)                             |
| 972 (6)                            | 942 (2)                          | 904 (2)                               | 881 (3)                             |
| 965 (3)                            | 941 (13)                         | 812 (5)                               | 807 (2)                             |
| 688 (1)                            | 642 (2)                          | 732 (105)                             | 709 (116)                           |
| 562 (66)                           | 557 (54)                         | 510 (150)                             | 513 (49)                            |
| <i>trans</i> -CH <sub>3</sub> CSO• | <i>cis</i> -CH <sub>3</sub> CSO• | <i>trans</i> -•CH <sub>2</sub> C(O)SH | <i>cis</i> -•CH <sub>2</sub> C(O)SH |
| 2911 (2)                           | 2923 (2)                         | 3118 (1)                              | 3120 (1)                            |
| 2895 (5)                           | 2906 (3)                         | 3022 (1)                              | 3023 (0.3)                          |
| 2864 (5)                           | 2864 (0.2)                       | 2552 (1)                              | 2685 (2)                            |
| 1416 (9)                           | 1407 (9)                         | 1597 (150)                            | 1611 (163)                          |
| 1400 (10)                          | 1396 (11)                        | 1424 (8)                              | 1422 (12)                           |
| 1359 (1)                           | 1350 (6)                         | 1154 (115)                            | 1144 (100)                          |
| 1330 (4)                           | 1339 (0.5)                       | 1015 (12)                             | 1002 (10)                           |
| 1102 (176)                         | 1046 (135)                       | 878 (4)                               | 870 (8)                             |
| 991 (1)                            | 992 (0)                          | 745 (27)                              | 746 (27)                            |
| 971 (1)                            | 966 (2)                          | 611 (20)                              | 605 (66)                            |
| 722 (7)                            | 703 (8)                          | 534 (1)                               | 534 (1)                             |
| <i>trans</i> -CH <sub>3</sub> OCS• | <i>cis</i> -CH <sub>3</sub> OCS• | CH <sub>3</sub> C(O)S•                | CH <sub>3</sub> S•••CO              |
| 3014 (8)                           | 3033 (8)                         | 3133 (2)                              | 2913 (106)                          |
| 2996 (12)                          | 3007 (10)                        | 3105 (1)                              | 2886 (12)                           |
| 2960 (43)                          | 2967 (16)                        | 3039 (0.2)                            | 2886 (12)                           |
| 1462 (425)                         | 1464 (156)                       | 1682 (119)                            | 2198 (81)                           |
| 1454 (1159)                        | 1443 (4)                         | 1466 (13)                             | 1478 (97)                           |
| 1447 (219)                         | 1440 (12)                        | 1458 (20)                             | 1301 (38)                           |
| 1339 (458)                         | 1331 (321)                       | 1388 (24)                             | 1297 (20)                           |
| 1169 (5)                           | 1147 (0.2)                       | 1153 (102)                            |                                     |
| 1140 (1)                           | 1116 (1)                         | 1027 (1)                              |                                     |
| 996 (68)                           | 903 (0.6)                        | 933 (66)                              |                                     |
| 878 (6)                            | 788 (26)                         | 632 (33)                              |                                     |
| 465 (19)                           | 602 (3)                          | 500 (1)                               |                                     |

**Table S2.** TD-DFT B3LYP/6-311++G(3df,3pd) calculated vertical transitions (> 190 nm) of CH<sub>2</sub>=C(H)SO• isomers.

| <i>trans</i> -CH <sub>2</sub> =C(H)SO• |                     | <i>cis</i> -CH <sub>2</sub> =C(H)SO• |                     | <i>trans</i> -•CH <sub>2</sub> C(O)SH |                     | <i>cis</i> -•CH <sub>2</sub> C(O)SH |                     |
|----------------------------------------|---------------------|--------------------------------------|---------------------|---------------------------------------|---------------------|-------------------------------------|---------------------|
| Energy (nm)                            | oscillator strength | Energy (nm)                          | oscillator strength | Energy (nm)                           | oscillator strength | Energy (nm)                         | oscillator strength |
| 540                                    | 0.0007              | 520                                  | 0.0006              | 710                                   | 0.0001              | 694                                 | 0.0001              |
| 389                                    | 0.0112              | 368                                  | 0.0065              | 515                                   | 0.0154              | 522                                 | 0.0139              |
| 269                                    | 0.1082              | 282                                  | 0.1622              | 237                                   | 0.0001              | 265                                 | 0.0006              |
| 265                                    | 0.0003              | 275                                  | 0.0009              | 235                                   | 0.0032              | 237                                 | 0.0001              |
| 235                                    | 0.0006              | 232                                  | 0.0002              | 226                                   | 0.0002              | 235                                 | 0.0024              |
| 228                                    | 0.0001              | 229                                  | 0.0148              | 221                                   | 0.001               | 220                                 | 0.0017              |
| 225                                    | 0.0538              | 228                                  | 0.0002              | 218                                   | 0.0005              | 215                                 | 0.0194              |
| 217                                    | 0.004               | 214                                  | 0.0019              | 211                                   | 0.0356              | 211                                 | 0.0178              |
| 213                                    | 0.0173              | 213                                  | 0.0013              |                                       |                     | 209                                 | 0.0007              |

  

| <i>trans</i> -CH <sub>3</sub> SCO• |                     | <i>cis</i> -CH <sub>3</sub> SCO• |                     | <i>trans</i> -•CH <sub>2</sub> SC(O)H |                     | <i>cis</i> -•CH <sub>2</sub> SC(O)H |                     |
|------------------------------------|---------------------|----------------------------------|---------------------|---------------------------------------|---------------------|-------------------------------------|---------------------|
| Energy (nm)                        | oscillator strength | Energy (nm)                      | oscillator strength | Energy (nm)                           | oscillator strength | Energy (nm)                         | oscillator strength |
| 445                                | 0.0005              | 424                              | 0.001               | 378                                   | 0.0273              | 412                                 | 0.0211              |
| 387                                | 0.0007              | 364                              | 0.0005              | 361                                   | 0.0001              | 305                                 | 0.0026              |
| 279                                | 0.0177              | 284                              | 0.0003              | 307                                   | 0.0041              | 283                                 | 0.0001              |
| 265                                | 0.0007              | 259                              | 0.0012              | 270                                   | 0.0803              | 275                                 | 0.0025              |
| 249                                | 0.0044              | 240                              | 0.0045              | 234                                   | 0.0048              | 260                                 | 0.1035              |
| 229                                | 0.0284              | 235                              | 0.0066              | 231                                   | 0.0001              | 241                                 | 0.0005              |
| 227                                | 0.0011              | 218                              | 0.002               | 226                                   | 0.0045              | 233                                 | 0.0022              |
| 214                                | 0.0262              | 207                              | 0.0112              | 218                                   | 0.008               | 222                                 | 0.0041              |
| 212                                | 0.0146              |                                  |                     |                                       |                     |                                     |                     |

  

| CH <sub>3</sub> C(O)S• |                     | CH <sub>3</sub> S•···CO |                     |
|------------------------|---------------------|-------------------------|---------------------|
| Energy (nm)            | oscillator strength | Energy (nm)             | oscillator strength |
| 870                    | 0.0060              | 326                     | 0.002               |
| 284                    | 0.0011              | 275                     | 0.0006              |
| 268                    | 0.0001              | 257                     | 0.0007              |
| 258                    | 0.0033              | 244                     | 0.0003              |
| 219                    | 0.0691              | 228                     | 0.0043              |
| 198                    | 0.0012              | 216                     | 0.0022              |
|                        |                     | 213                     | 0.0013              |

**Calculated atomic coordinates (in Angstroms) and energies (in Hartree) for the isomers of CH<sub>2</sub>=C(H)SO• and the transition states with the B3LYP/6-311++G(3df,3pd) method.**

***trans*-CH<sub>2</sub>=C(H)SO• (2t)**

|                                              |             |                             |            |
|----------------------------------------------|-------------|-----------------------------|------------|
| C                                            | 1.32715100  | -1.60645400                 | 0.00000000 |
| H                                            | 1.39001200  | -2.68529900                 | 0.00000000 |
| H                                            | 2.26133300  | -1.05910100                 | 0.00000000 |
| C                                            | 0.14354200  | -0.98574700                 | 0.00000000 |
| H                                            | -0.80494600 | -1.51046700                 | 0.00000000 |
| S                                            | 0.00000000  | 0.75453600                  | 0.00000000 |
| O                                            | -1.45881900 | 1.09193700                  | 0.00000000 |
| Zero-point correction=                       |             | 0.045252 (Hartree/Particle) |            |
| Thermal correction to Energy=                |             | 0.050049                    |            |
| Thermal correction to Enthalpy=              |             | 0.050993                    |            |
| Thermal correction to Gibbs Free Energy=     |             | 0.016934                    |            |
| Sum of electronic and zero-point Energies=   |             | -551.417021                 |            |
| Sum of electronic and thermal Energies=      |             | -551.412224                 |            |
| Sum of electronic and thermal Enthalpies=    |             | -551.411280                 |            |
| Sum of electronic and thermal Free Energies= |             | -551.445340                 |            |

***cis*-CH<sub>2</sub>=C(H)SO• (2c)**

|                                              |             |                             |             |
|----------------------------------------------|-------------|-----------------------------|-------------|
| C                                            | -1.76847300 | 0.50693800                  | -0.00000600 |
| H                                            | -2.84342400 | 0.39576900                  | -0.00001400 |
| H                                            | -1.35729500 | 1.50718200                  | 0.00001600  |
| C                                            | -0.96494100 | -0.56135900                 | -0.00002200 |
| H                                            | -1.33467100 | -1.58102200                 | 0.00018800  |
| S                                            | 0.77519200  | -0.47795300                 | -0.00001100 |
| O                                            | 1.19160100  | 0.95648000                  | 0.00001800  |
| Zero-point correction=                       |             | 0.045544 (Hartree/Particle) |             |
| Thermal correction to Energy=                |             | 0.050132                    |             |
| Thermal correction to Enthalpy=              |             | 0.051077                    |             |
| Thermal correction to Gibbs Free Energy=     |             | 0.017510                    |             |
| Sum of electronic and zero-point Energies=   |             | -551.418327                 |             |
| Sum of electronic and thermal Energies=      |             | -551.413739                 |             |
| Sum of electronic and thermal Enthalpies=    |             | -551.412794                 |             |
| Sum of electronic and thermal Free Energies= |             | -551.446361                 |             |

***trans*-•CH<sub>2</sub>C(O)SH (5t)**

|                                              |             |                             |             |
|----------------------------------------------|-------------|-----------------------------|-------------|
| C                                            | 1.30438400  | -1.05095900                 | -0.00004200 |
| H                                            | 0.85025600  | -2.03056900                 | 0.00056300  |
| H                                            | 2.37984400  | -0.95329500                 | -0.00017300 |
| S                                            | -1.27022300 | -0.17998200                 | -0.00003400 |
| H                                            | -1.61103900 | 1.11823700                  | 0.00034800  |
| C                                            | 0.51323400  | 0.14774000                  | -0.00002200 |
| O                                            | 0.97485000  | 1.27058100                  | 0.00002400  |
| Zero-point correction=                       |             | 0.042431 (Hartree/Particle) |             |
| Thermal correction to Energy=                |             | 0.047256                    |             |
| Thermal correction to Enthalpy=              |             | 0.048200                    |             |
| Thermal correction to Gibbs Free Energy=     |             | 0.014297                    |             |
| Sum of electronic and zero-point Energies=   |             | -551.427692                 |             |
| Sum of electronic and thermal Energies=      |             | -551.422866                 |             |
| Sum of electronic and thermal Enthalpies=    |             | -551.421922                 |             |
| Sum of electronic and thermal Free Energies= |             | -551.455826                 |             |

***cis*-•CH<sub>2</sub>C(O)SH (5c)**

|   |             |             |             |
|---|-------------|-------------|-------------|
| C | -1.28545200 | 1.07419200  | -0.00001200 |
| H | -0.83482300 | 2.05388000  | -0.00003800 |
| H | -2.36173500 | 0.97843500  | -0.00007300 |
| S | 1.29235700  | -0.00112000 | -0.00000700 |
| H | 1.38089200  | 1.33808500  | -0.00010500 |



|                                              |             |             |                    |
|----------------------------------------------|-------------|-------------|--------------------|
| C                                            | -0.51286400 | -0.13747000 | 0.00012800         |
| O                                            | -1.00901800 | -1.24660200 | -0.00004700        |
| Zero-point correction=                       |             | 0.042343    | (Hartree/Particle) |
| Thermal correction to Energy=                |             | 0.047224    |                    |
| Thermal correction to Enthalpy=              |             | 0.048168    |                    |
| Thermal correction to Gibbs Free Energy=     |             | 0.014147    |                    |
| Sum of electronic and zero-point Energies=   |             | -551.425312 |                    |
| Sum of electronic and thermal Energies=      |             | -551.420432 |                    |
| Sum of electronic and thermal Enthalpies=    |             | -551.419487 |                    |
| Sum of electronic and thermal Free Energies= |             | -551.453508 |                    |

***trans*-CH<sub>3</sub>SCO• (3t)**

|                                              |             |             |                    |
|----------------------------------------------|-------------|-------------|--------------------|
| C                                            | -1.74260400 | 0.59095900  | -0.00000600        |
| H                                            | -2.67036000 | 0.02345300  | -0.00113900        |
| H                                            | -1.69410100 | 1.20508900  | 0.89382500         |
| H                                            | -1.69271300 | 1.20638600  | -0.89286400        |
| S                                            | -0.40719500 | -0.64344000 | 0.00000600         |
| C                                            | 0.98913500  | 0.44810700  | 0.00006300         |
| O                                            | 2.13663800  | 0.20321400  | -0.00003400        |
| Zero-point correction=                       |             | 0.045054    | (Hartree/Particle) |
| Thermal correction to Energy=                |             | 0.050338    |                    |
| Thermal correction to Enthalpy=              |             | 0.051282    |                    |
| Thermal correction to Gibbs Free Energy=     |             | 0.015928    |                    |
| Sum of electronic and zero-point Energies=   |             | -551.431308 |                    |
| Sum of electronic and thermal Energies=      |             | -551.426024 |                    |
| Sum of electronic and thermal Enthalpies=    |             | -551.425080 |                    |
| Sum of electronic and thermal Free Energies= |             | -551.460433 |                    |

***cis*-CH<sub>3</sub>SCO• (3c)**

|                                              |             |             |                    |
|----------------------------------------------|-------------|-------------|--------------------|
| C                                            | 1.60374200  | 0.03570200  | 0.00000000         |
| H                                            | 2.37274700  | 0.80495000  | 0.00000000         |
| H                                            | 1.69209300  | -0.57667700 | 0.89233600         |
| H                                            | 1.69209300  | -0.57667700 | -0.89233600        |
| S                                            | 0.00000000  | 0.92018100  | 0.00000000         |
| C                                            | -1.17002600 | -0.37246500 | 0.00000000         |
| O                                            | -1.04490400 | -1.54424000 | 0.00000000         |
| Zero-point correction=                       |             | 0.044905    | (Hartree/Particle) |
| Thermal correction to Energy=                |             | 0.050165    |                    |
| Thermal correction to Enthalpy=              |             | 0.051109    |                    |
| Thermal correction to Gibbs Free Energy=     |             | 0.015661    |                    |
| Sum of electronic and zero-point Energies=   |             | -551.429378 |                    |
| Sum of electronic and thermal Energies=      |             | -551.424118 |                    |
| Sum of electronic and thermal Enthalpies=    |             | -551.423173 |                    |
| Sum of electronic and thermal Free Energies= |             | -551.458621 |                    |

***trans*-•CH<sub>2</sub>SC(O)H (4t)**

|                                            |             |             |                    |
|--------------------------------------------|-------------|-------------|--------------------|
| C                                          | 1.76790400  | 0.54455000  | 0.00003100         |
| H                                          | 1.57174000  | 1.60582600  | -0.00168800        |
| H                                          | 2.77612500  | 0.16737500  | 0.00140100         |
| S                                          | 0.49783500  | -0.59247400 | -0.00007700        |
| H                                          | -0.69925600 | 1.52922400  | 0.00092900         |
| C                                          | -0.94972000 | 0.45319700  | 0.00008300         |
| O                                          | -2.06538400 | 0.02383400  | -0.00001100        |
| Zero-point correction=                     |             | 0.042633    | (Hartree/Particle) |
| Thermal correction to Energy=              |             | 0.048095    |                    |
| Thermal correction to Enthalpy=            |             | 0.049039    |                    |
| Thermal correction to Gibbs Free Energy=   |             | 0.013759    |                    |
| Sum of electronic and zero-point Energies= |             | -551.416344 |                    |
| Sum of electronic and thermal Energies=    |             | -551.410882 |                    |
| Sum of electronic and thermal Enthalpies=  |             | -551.409937 |                    |

Sum of electronic and thermal Free Energies= -551.445218

**cis-•CH<sub>2</sub>SC(O)H (4c)**

|                                              |                             |             |             |
|----------------------------------------------|-----------------------------|-------------|-------------|
| C                                            | -1.28545200                 | 1.07419200  | -0.00001200 |
| H                                            | -0.83482300                 | 2.05388000  | -0.00003800 |
| H                                            | -2.36173500                 | 0.97843500  | -0.00007300 |
| S                                            | 1.29235700                  | -0.00112000 | -0.00000700 |
| H                                            | 1.38089200                  | 1.33808500  | -0.00010500 |
| C                                            | -0.51286400                 | -0.13747000 | 0.00012800  |
| O                                            | -1.00901800                 | -1.24660200 | -0.00004700 |
| Zero-point correction=                       | 0.042343 (Hartree/Particle) |             |             |
| Thermal correction to Energy=                | 0.047224                    |             |             |
| Thermal correction to Enthalpy=              | 0.048168                    |             |             |
| Thermal correction to Gibbs Free Energy=     | 0.014147                    |             |             |
| Sum of electronic and zero-point Energies=   | -551.425312                 |             |             |
| Sum of electronic and thermal Energies=      | -551.420432                 |             |             |
| Sum of electronic and thermal Enthalpies=    | -551.419487                 |             |             |
| Sum of electronic and thermal Free Energies= | -551.453508                 |             |             |

**CH<sub>3</sub>C(O)S• (6)**

|                                              |                             |             |             |
|----------------------------------------------|-----------------------------|-------------|-------------|
| C                                            | 1.45278000                  | -0.85177400 | -0.00001100 |
| H                                            | 1.34268600                  | -1.48590500 | -0.88030500 |
| H                                            | 2.43450100                  | -0.38271000 | -0.00145400 |
| H                                            | 1.34441900                  | -1.48381200 | 0.88201900  |
| C                                            | 0.39010600                  | 0.20522300  | -0.00007000 |
| O                                            | 0.59746300                  | 1.39844600  | 0.00001700  |
| S                                            | -1.30991400                 | -0.24724000 | 0.00000500  |
| Zero-point correction=                       | 0.046025 (Hartree/Particle) |             |             |
| Thermal correction to Energy=                | 0.051026                    |             |             |
| Thermal correction to Enthalpy=              | 0.051970                    |             |             |
| Thermal correction to Gibbs Free Energy=     | 0.016010                    |             |             |
| Sum of electronic and zero-point Energies=   | -551.441214                 |             |             |
| Sum of electronic and thermal Energies=      | -551.436212                 |             |             |
| Sum of electronic and thermal Enthalpies=    | -551.435268                 |             |             |
| Sum of electronic and thermal Free Energies= | -551.471228                 |             |             |

**CH<sub>3</sub>S•••CO (9)**

|                                              |                             |             |             |
|----------------------------------------------|-----------------------------|-------------|-------------|
| C                                            | -1.38627300                 | 1.07440900  | 0.00006100  |
| H                                            | -1.67537800                 | 1.61846000  | 0.89702000  |
| H                                            | -0.29646300                 | 0.97687400  | -0.00035800 |
| H                                            | -1.67604600                 | 1.61880700  | -0.89647200 |
| C                                            | 2.59086400                  | 0.15666400  | -0.00032600 |
| O                                            | 3.63753400                  | -0.25261000 | 0.00019000  |
| S                                            | -2.04249600                 | -0.59873200 | -0.00000800 |
| Zero-point correction=                       | 0.041102 (Hartree/Particle) |             |             |
| Thermal correction to Energy=                | 0.048521                    |             |             |
| Thermal correction to Enthalpy=              | 0.049466                    |             |             |
| Thermal correction to Gibbs Free Energy=     | 0.003939                    |             |             |
| Sum of electronic and zero-point Energies=   | -551.424776                 |             |             |
| Sum of electronic and thermal Energies=      | -551.417357                 |             |             |
| Sum of electronic and thermal Enthalpies=    | -551.416412                 |             |             |
| Sum of electronic and thermal Free Energies= | -551.461939                 |             |             |

**CH<sub>3</sub>S•••OC (9)**

|   |             |             |             |
|---|-------------|-------------|-------------|
| C | 1.36402200  | 1.10594800  | 0.02728900  |
| H | 1.58826700  | 1.40701400  | 1.05499000  |
| H | 2.09662700  | 1.57917600  | -0.62367500 |
| H | 0.35631900  | 1.43916100  | -0.21113000 |
| S | 1.50476000  | -0.68553200 | -0.02034700 |
| O | -2.45763900 | 0.45078200  | -0.07447700 |

|                                              |             |                             |            |
|----------------------------------------------|-------------|-----------------------------|------------|
| C                                            | -2.77339900 | -0.61646300                 | 0.08957400 |
| Zero-point correction=                       |             | 0.041000 (Hartree/Particle) |            |
| Thermal correction to Energy=                |             | 0.048477                    |            |
| Thermal correction to Enthalpy=              |             | 0.049421                    |            |
| Thermal correction to Gibbs Free Energy=     |             | 0.003921                    |            |
| Sum of electronic and zero-point Energies=   |             | -551.424577                 |            |
| Sum of electronic and thermal Energies=      |             | -551.417100                 |            |
| Sum of electronic and thermal Enthalpies=    |             | -551.416156                 |            |
| Sum of electronic and thermal Free Energies= |             | -551.461656                 |            |

**trans-CH<sub>3</sub>CSO• (10t)**

|                                              |             |                             |             |
|----------------------------------------------|-------------|-----------------------------|-------------|
| C                                            | -2.18913400 | -0.07056700                 | 0.00003200  |
| H                                            | -2.66464500 | -0.50445800                 | -0.88248000 |
| H                                            | -2.66493300 | -0.50260300                 | 0.88317200  |
| H                                            | -2.39378700 | 1.00578300                  | -0.00147000 |
| C                                            | -0.75464500 | -0.34620900                 | 0.00009600  |
| S                                            | 0.65110900  | 0.38176700                  | 0.00003100  |
| O                                            | 1.87103600  | -0.45079300                 | -0.00005900 |
| Zero-point correction=                       |             | 0.044568 (Hartree/Particle) |             |
| Thermal correction to Energy=                |             | 0.049767                    |             |
| Thermal correction to Enthalpy=              |             | 0.050711                    |             |
| Thermal correction to Gibbs Free Energy=     |             | 0.015811                    |             |
| Sum of electronic and zero-point Energies=   |             | -551.362344                 |             |
| Sum of electronic and thermal Energies=      |             | -551.357145                 |             |
| Sum of electronic and thermal Enthalpies=    |             | -551.356201                 |             |
| Sum of electronic and thermal Free Energies= |             | -551.391101                 |             |

**cis-CH<sub>3</sub>CSO• (10c)**

|                                              |             |                             |             |
|----------------------------------------------|-------------|-----------------------------|-------------|
| C                                            | -2.04561800 | 0.28805500                  | 0.00001500  |
| H                                            | -2.64254600 | 0.05414200                  | -0.88418700 |
| H                                            | -2.64242500 | 0.05421800                  | 0.88431800  |
| H                                            | -1.84177200 | 1.36466600                  | -0.00007000 |
| C                                            | -0.79372200 | -0.45571400                 | -0.00004800 |
| S                                            | 0.79107500  | -0.46713800                 | 0.00001200  |
| O                                            | 1.43819800  | 0.87589200                  | -0.00000700 |
| Zero-point correction=                       |             | 0.044529 (Hartree/Particle) |             |
| Thermal correction to Energy=                |             | 0.049752                    |             |
| Thermal correction to Enthalpy=              |             | 0.050696                    |             |
| Thermal correction to Gibbs Free Energy=     |             | 0.015143                    |             |
| Sum of electronic and zero-point Energies=   |             | -551.363280                 |             |
| Sum of electronic and thermal Energies=      |             | -551.358057                 |             |
| Sum of electronic and thermal Enthalpies=    |             | -551.357112                 |             |
| Sum of electronic and thermal Free Energies= |             | -551.392666                 |             |
